# Supplementary material for: A sub-10 nm monolayer ReS2 transistor for low-power applications
Source: Royal Society of Chemistry journal article supplement (doi:10.1039/c8tc05863f), 2019-01-01
Supplement: c8tc05863f1.pdf [file c8tc05863f1.pdf]

(Supplementary Information)

## Sub-10 nm Monolayer ReS<sub>2</sub> Transistor for Low Power Applications

Ruge Quhe,<sup>1,\*</sup> Jianxiu Chen,<sup>1</sup> and Jing Lu<sup>2,3,\*</sup>

<sup>1</sup>State Key Laboratory of Information Photonics and Optical Communications, Beijing University of Posts and Telecommunications, Beijing 100876, P. R. China

<sup>2</sup>State Key Laboratory for Mesoscopic Physics and Department of Physics, Peking University, Beijing 100871, P. R. China

<sup>3</sup>Collaborative Innovation Center of Quantum Matter, Beijing 100871, P. R. China

### 1. Basis sets

The differences of transmission spectra at  $L_g = 4$  nm and  $V_g = -1.3$  V in zigzag direction between Double-Zeta-Polarized (DZP) and Single-Zeta-Polarized (SZP) are shown in Fig. S1. Our tests shown that the calculated results using SZP and DZP basis set are consistent.

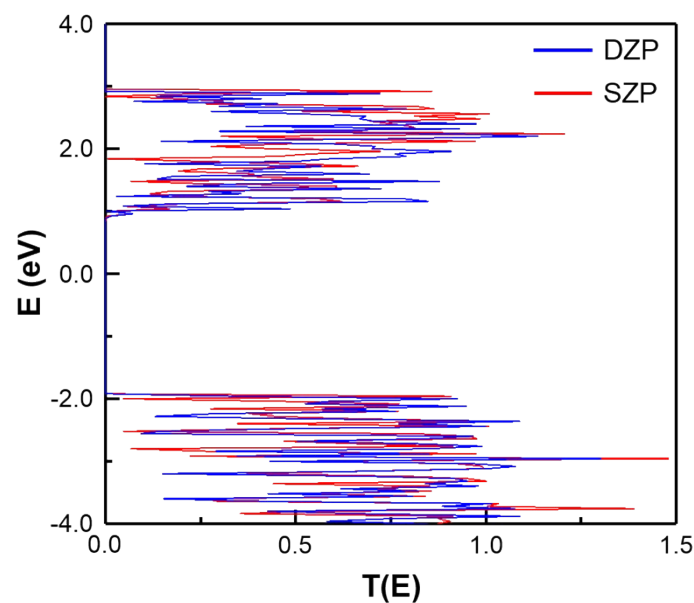

**Fig. S1.** Transmission spectra of zigzag-directed ReS<sub>2</sub> transistor (at  $L_g = 4$  nm and  $V_g = -1.3$  V) using SZP and DZP basis sets, respectively.

## 2. Influences induce by the applied gate in ReS<sub>2</sub>

The applied gate in ReS<sub>2</sub> may induce structure distortion in ReS<sub>2</sub> monolayer. We considered this situation and done some experiments to analyze the possible effects. We have compared the results with and without the applied gate on the unit cell level and the device level, respectively.

At the unit cell level, we chosen a high gate voltage of  $V_g = -1.1$  V to compare with the case of  $V_g = 0$  V. Several important parameters were compared and the results were listed in the Table S1. It is found that the optimized ReS<sub>2</sub> layer with and without gates show quite similar lattice constants (the difference is less than 0.15%). Their type and value of the band gaps are the same.

**Table S1.** Material parameters of ReS<sub>2</sub> unit cell with and without a gate.

|                          | Without applied gate | With applied gate<br>( $V_g = -1.1$ V) |
|--------------------------|----------------------|----------------------------------------|
| Lattice constant $a$ (Å) | 6.46                 | 6.47                                   |
| Lattice constant $b$ (Å) | 6.56                 | 6.57                                   |
| Band gap (eV)            | 1.47                 | 1.47                                   |
| Type of band gap         | direct band gap      | direct band gap                        |

At the device level, we have compared the performance of the 8 nm gate-length zigzag-directed ReS<sub>2</sub> transistor with and without the consideration of the structural distortion induced by the gate. Their transmission spectra of the same order of magnitude and have transmission gaps of the same size (Fig. S2).

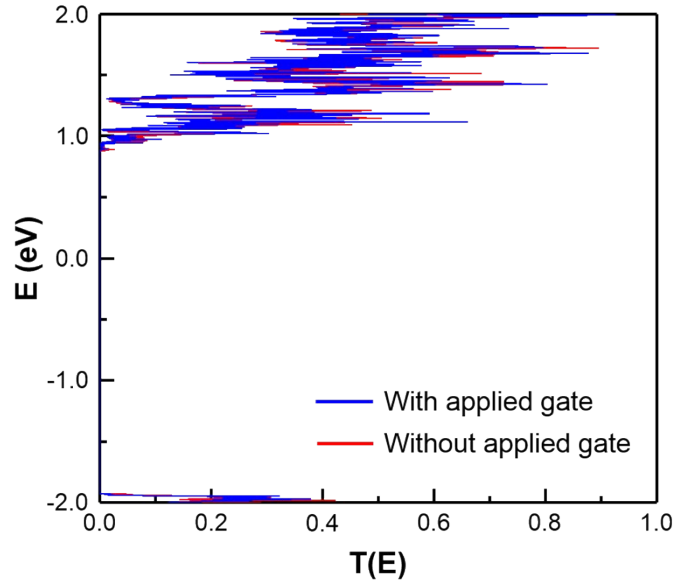

**Fig. S2.** Transmission spectra of the zigzag-directed ReS<sub>2</sub> transistor (at  $L_g = 8$  nm and at  $V_g = -1.1$  V) with and without consideration of the structural distortion induced by a gate.

In summary, we prove that the structure distortion of ReS<sub>2</sub> induced by the applied gate is

negligible, and the device performance with and without the consideration of this structural distortion are expected to be similar.

### 3. van der Waals correction

Van der Waals (vdW) force plays an important role in layered materials. To check the effects of the vdW force, we adopted Grimme DFT-D2 vdW correction method at both the unit cell level and the device level.

At the unit cell level, we compared the key geometric and electronic parameters of ReS<sub>2</sub> with and without considering the vdW correction as shown in Table S2. No apparent difference is found.

**Table S2.** Material parameters of ReS<sub>2</sub> cell with and without van der Waals correction.

|                          | Without vdW correction | With vdW correction |
|--------------------------|------------------------|---------------------|
| Lattice constant $a$ (Å) | 6.46                   | 6.46                |
| Lattice constant $b$ (Å) | 6.56                   | 6.56                |
| Band gap (eV)            | 1.47                   | 1.47                |
| Type of band gap         | direct band gap        | direct band gap     |

At the device level, the comparison of transmission spectra of the zigzag-directed ReS<sub>2</sub> transistor (at  $L_g = 8$  nm and at  $V_g = -1.1$  V) with and without vdW correction as shown in Figure S3. The transmission spectra are nearly the same with similar magnitudes and transmission gaps.

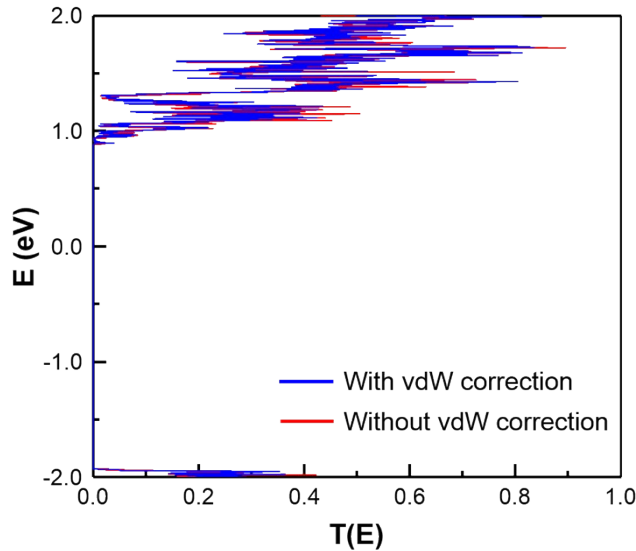

**Fig. S3.** Transmission spectra of zigzag-directed ReS<sub>2</sub> transistor (at  $L_g = 8$  nm and  $V_g = -1.1$  V) with and without vdW correction.

In summary, we proved that the differences taking van der Waals correction into account in ReS<sub>2</sub> are negligible.
